# Supplementary material for: Facet and d-band center engineering of CuNi nanocrystals for efficient nitrate electroreduction to ammonia
Source: Royal Society of Chemistry journal article supplement (doi:10.1039/d2dt02256g), 2022-01-01
Supplement: d2dt02256g1.pdf [file d2dt02256g1.pdf]

# Electronic Supplementary Information

## Facet and d-band center engineering of CuNi nanocrystals for efficient nitrate electroreduction to ammonia

Jiao Wang,<sup>a</sup> Linlin Zhang,<sup>\*a, b</sup> Yuanyuan Wang,<sup>a</sup> Yongjian Niu,<sup>a</sup> Dong Fang,<sup>a</sup> Qingxiao Su,<sup>a</sup> and Cheng Wang<sup>a</sup>

<sup>a</sup> Institute for New Energy Materials and Low-Carbon Technologies

School of Material Science and Engineering

Tianjin Key Laboratory of Advanced Functional Porous Materials

Tianjin University of Technology

Tianjin 300384, People's Republic of China

<sup>b</sup> CAS Key Laboratory of Design and Assembly of Functional Nanostructures

Fujian Key Laboratory of Nanomaterials

Fujian Institute of Research on the Structure of Matter, Chinese Academy of Sciences

Fuzhou 350002, People's Republic of China

\* Corresponding author: [Linlin Zhang](mailto:Linlin Zhang), [zhanglinlin\\_cn@126.com](mailto:zhanglinlin_cn@126.com)

## Table of contents

### Supplementary experimental details

1. Determination of  $\text{NH}_3/\text{NH}_4^+$
2. Determination of  $\text{NO}_2^-$  and  $\text{NO}_3^-$
3. Determination of  $\text{N}_2\text{H}_4$

**Equation 1:** d-band center

**Equation 2:** Applied potential relative to the reversible hydrogen electrode

**Equation 3:** Yield of  $\text{NH}_3$

**Equation 4:** Faradaic efficiency of  $\text{NH}_3$

**Equation 5:** Partial current density of  $\text{NH}_3$

**Equation 6:** Selectivity of  $\text{NH}_3$

**Equation 7:** Energy efficiency for nitrate electroreduction to ammonia

**Equation 8:** Yield of  $\text{NO}_2^-$

**Equation 9:** Faradaic efficiency of  $\text{NO}_2^-$

**Equation 10:** Yield of  $\text{N}_2\text{H}_4$

**Equation 11:** Faradaic efficiency of  $\text{N}_2\text{H}_4$

**Equation 12:** Tafel plots

**Equation 13:** Pseudo-first order kinetic equation

**Equation 14:** Linear expression of the Langmuir-Hinshelwood model

**Equation 15:** Adsorption free energy of  $\text{NO}_3^-$

**Equation 16:** Apparent activation energy

**Equation 17:** Charge transfer number

**Figure S1:** SEM images and XRD patterns for  $\text{Cu}_{0.5}$ ,  $\text{Cu}_{0.4}\text{Ni}_{0.1}$ ,  $\text{Cu}_{0.25}\text{Ni}_{0.25}$ ,  $\text{Cu}_{0.1}\text{Ni}_{0.4}$  and  $\text{Ni}_{0.5}$ .

**Figure S2:** Photograph of the setup for  $\text{NO}_3\text{RR}$ .

**Figure S3:** UV-vis absorption spectra of the standard  $\text{NH}_4\text{Cl}$  solutions stained with the indophenol blue coloring agent and the corresponding standard curve.

**Figure S4:** Chronoamperometric responses and the corresponding UV-vis absorption spectra of the catholytes stained with the indophenol blue for samples of  $\text{Cu}_{0.25}\text{Ni}_{0.25}$ ,  $\text{Cu}_{0.5}$  and  $\text{Ni}_{0.5}$ .

**Figure S5:** Yield and FE of the possible by-product of  $\text{NO}_2^-$  after electrolysis in 1 M KOH solutions containing 75 Mm  $\text{KNO}_3$  at different potentials with  $\text{Cu}_{0.25}\text{Ni}_{0.25}$  as the catalyst.

**Figure S6:** Determination of the possible by-product of  $\text{N}_2\text{H}_4$  according to the Watt-Chrisp method.

**Figure S7:** The concentration of  $\text{NO}_3^-$ ,  $\text{NO}_2^-$  and  $\text{NH}_4^+$  as a function of reaction time with  $\text{Cu}_{0.25}\text{Ni}_{0.25}$  as the catalyst.

**Figure S8:**  $\text{N}_2$  adsorption-desorption isotherms and the corresponding pore size distributions for the samples of  $\text{Cu}_{0.25}\text{Ni}_{0.25}$ ,  $\text{Cu}_{0.5}$  and  $\text{Ni}_{0.5}$ .

**Figure S9:** Scan-rate dependent CV curves at the non-faradaic potential ranges for the samples of  $\text{Cu}_{0.5}$ ,  $\text{Ni}_{0.5}$  and  $\text{Cu}_{0.25}\text{Ni}_{0.25}$  and the corresponding double layer capacitances ( $C_{dl}$ ).

**Figure S10-S12.** Linear fitting plots of  $\ln C_0/C_t$  against the reaction time  $t$  according to the pseudo first order kinetic equation for  $\text{Cu}_{0.5}$ ,  $\text{Cu}_{0.25}\text{Ni}_{0.25}$  and  $\text{Ni}_{0.5}$  with different initial nitrate concentrations in the electrolytes.

**Table S1:** Molar ratios of Cu/Ni in the bimetal catalysts obtained from the ICP-MS tests.

**Table S2:** Binding energies of different components in Cu 2p and Ni 2p XPS for the samples of  $\text{Cu}_{0.5}\text{Ni}_{0.5}$  and  $\text{Cu}_{0.25}\text{Ni}_{0.25}$ .

**Table S3:** Performance comparison with reported Cu or Ni-based catalysts for nitrate electroreduction to ammonia

## Supplementary experimental details

### Determination of $\text{NH}_3/\text{NH}_4^+$

*Indophenol blue method.* Firstly, both the pristine blank electrolyte and the cathodic electrolyte were diluted 200 folds with deionized water. Then, a series of standard solutions of  $\text{NH}_4\text{Cl}$  (0.4, 0.8, 1.2, 1.6, 2.0 ppm) in the diluted blank electrolyte were prepared to establish the standard curve. The strongest absorption peak appeared at 655 nm. Afterwards, 2 mL of the coloring solution (5 wt%  $\text{C}_7\text{H}_6\text{O}_3$ , 5 wt%  $\text{C}_6\text{H}_5\text{Na}_3\text{O}_7 \cdot 2\text{H}_2\text{O}$  and 1 M NaOH), 1 mL of the oxidizing solution ( $\text{NaClO}$  ( $\rho = 4\text{--}4.9$ )) and 0.2 mL of the catalyst solution (1 wt%  $\text{C}_3\text{FeN}_6\text{Na}_2\text{O} \cdot 2\text{H}_2\text{O}$ ) were added to 2 mL of the standard or diluted sample solutions in sequence. The mixtures were then kept undisturbed at room temperature for 2 h. UV-vis absorption spectra were recorded on a UV3900 spectrophotometer (Shimadzu) in the wavelength range from 500 to 800 nm at a scan rate of  $300 \text{ nm min}^{-1}$ . According to the standard curve and the measured absorbance, the concentration of ammonia produced from  $\text{NO}_3\text{RR}$  could be finally obtained.

*$^1\text{H}$  NMR spectra.* A series of standard solutions of  $\text{NH}_4\text{Cl}$  (100, 200, 300, 400, 500 ppm) in the pristine blank electrolyte were prepared to establish the standard curve. The pH value of the standard solutions of  $\text{NH}_4\text{Cl}$  and the cathodic electrolyte were adjusted to 3.0 by the addition of 0.5 M  $\text{H}_2\text{SO}_4$ . The test solutions comprised of 0.5 mL of the above  $\text{NH}_4\text{Cl}$  solutions or cathodic electrolytes, 0.1 mL of DMSO (0.01 vol%) and 0.1 mL of  $\text{D}_2\text{O}$  aqueous solution. Then,  $^1\text{H}$  NMR spectra were acquired on a nuclear magnetic resonance spectrometer (AVANCE III HD 400 MHz, Bruker) after scanning 400 times in water suppression mode. Based on the standard curve and the measured peak area, the concentration of ammonia produced from  $\text{NO}_3\text{RR}$  could be obtained. To identify the origin of nitrogen in ammonia produced, isotope labelling experiments were carried out using  $\text{K}^{15}\text{NO}_3$  to replace  $\text{KNO}_3$  in the electrochemical tests and the corresponding products were analyzed using  $^1\text{H}$ -NMR spectra in a similar way.

### Determination of NO<sub>2</sub><sup>-</sup> and NO<sub>3</sub><sup>-</sup>

*Ion chromatography (IC).* Both the pristine blank electrolyte and the cathodic electrolytes were diluted 500 folds using deionized water. Standard solutions of NO<sub>2</sub><sup>-</sup> (0.2, 0.4, 0.6, 0.8, 1.0 ppm) and NO<sub>3</sub><sup>-</sup> (3, 6, 9, 12, 15 ppm) in diluted blank electrolyte were prepared to build the standard curves. The pH values of the standard solutions, diluted blank electrolyte and diluted cathodic electrolytes were adjusted to 7.0 using 0.5 M HCl. The concentrations of anions were measured using an anionic column (Metrosep A Supp 5-150/0.4) at room temperature with an eluent flow rate of 0.1 mL min<sup>-1</sup>. The anionic eluent contained 3.2 mM Na<sub>2</sub>CO<sub>3</sub> and 1.0 mM NaHCO<sub>3</sub>. Termination of the retention time was set to 11 min and peaks assigned to NO<sub>2</sub><sup>-</sup> and NO<sub>3</sub><sup>-</sup> occurred at 6.35 and 9.5 min, respectively. According to the calibration curve and the measured peak areas, the concentrations of generated NO<sub>2</sub><sup>-</sup> and remaining NO<sub>3</sub><sup>-</sup> could be obtained.

### Determination of N<sub>2</sub>H<sub>4</sub>

*Watt-Chrisp method.* Both the pristine blank electrolyte and the cathodic electrolyte were diluted 300 folds using deionized water. Standard solutions of N<sub>2</sub>H<sub>4</sub> in the diluted blank electrolyte (0.2, 0.4, 0.6, 0.8, 1.0 ppm) were prepared to build the calibration curve. The color reagent was a mixture containing 0.5 g of p-dimethylaminobenzaldehyde, 25 mL of ethanol and 2.5 mL of concentrated HCl. Then, 0.1 mL of concentrated HCl solution was added to 4 mL of N<sub>2</sub>H<sub>4</sub> standard solutions or diluted electrolytes to adjust the pH values of the solutions to the acidic range, followed by the addition of 0.5 mL of color reagent. The resulting solutions were then allowed to stand for 5 min. Subsequently, UV-vis absorption spectra were measured in the wavelength range of 400-500 nm at a scan rate of 300 nm min<sup>-1</sup>. The maximum absorbance ought to occur at about 455 nm. According to the calibration curve and the measured absorbance, the concentration of N<sub>2</sub>H<sub>4</sub> could be determined.

The equations involved in this work are listed as follows:

$$\epsilon_d = \int_{-\infty}^{\infty} n_d(\epsilon) \epsilon d\epsilon / \int_{-\infty}^{\infty} n(\epsilon) d\epsilon \quad (1)$$
, where  $\epsilon_d$  is the d-band center,  $\epsilon$  is the energy relative to the fermi level and  $n_d(\epsilon)$  is the photoelectron intensity after the subtraction of the shirley-type background.

The upper level of the integration was fixed at 8.0 eV for accurate comparison.

$E$  (vs. RHE) =  $E$  (vs. Hg/HgO) + 0.059 × pH + 0.098 **(2)**, where  $E$  (vs. RHE) and  $E$  (vs. Hg/HgO) are the applied potentials relative to the reversible hydrogen electrode and to the Hg/HgO electrode, respectively.

$Y_{NH_3} = C(NH_3) \times V / (t \times m_{cat.})$  **(3)**,  $FENH_3 = 8F \times C(NH_3) \times V / (17Q) \times 100\%$  **(4)**, and  $J_{NH_3} = (I \times FENH_3) / A$  **(5)**, where  $Y_{NH_3}$ ,  $FENH_3$  and  $J_{NH_3}$  are the yield, faradaic efficiency and partial current density of  $NH_3$ , respectively;  $C(NH_3)$  is the molar concentration of measured  $NH_3$ ,  $V$  is the volume of the electrolyte,  $t$  is the electrolysis time,  $m_{cat.}$  is the mass of the loaded catalyst,  $F$  is the Faraday constant (96485 C mol<sup>-1</sup>) and  $Q = \int_0^t j dt$ ,  $j$  is the geometric current density),  $I$  is the current during the constant potential electrolysis,  $A$  is the surface area of the cathode.

Selec. =  $C(NH_3) / \Delta C(NO_3^-) \times 100\%$  **(6)**, where Selec. is the selectivity of  $NH_3$ ,  $C_0$  is the initial concentration of  $NO_3^-$  in the electrolyte and  $\Delta C(NO_3^-)$  is the concentration difference of  $NO_3^-$  before and after electrolysis.

$EENH_3 = (1.23 - E_{NH_3}^0) FENH_3 / (1.23 - E)$  **(7)**, where  $EENH_3$  is the energy efficiency for nitrate electroreduction to ammonia,  $E_{NH_3}^0$  is the equilibrium potential of nitrate electroreduction to ammonia (0.69 V),  $FENH_3$  is the faradaic efficiency for ammonia, 1.23 V is the equilibrium potential of water oxidation and  $E$  is the applied potential vs. RHE.

$Y_{NO_2^-} = C(NO_2^-) \times V / (t \times m_{cat.})$  **(8)**,  $FENO_2^- = 2F \times C(NO_2^-) \times V / (46Q) \times 100\%$  **(9)**, where  $Y_{NO_2^-}$  and  $FENO_2^-$  are the yield and faradaic efficiency of  $NO_2^-$ , respectively;  $C(NO_2^-)$  is the molar concentration of measured  $NO_2^-$ ,  $V$  is the volume of the electrolyte,  $t$  is the electrolysis time,  $m_{cat.}$  is the mass of the loaded catalyst,  $F$  is the Faraday constant (96485 C mol<sup>-1</sup>) and  $Q = \int_0^t j dt$ ,  $j$  is the geometric current density).

$Y_{N_2H_4} = C(N_2H_4) \times V / (t \times m_{cat.})$  **(10)**,  $FEN_2H_4 = 7F \times C(N_2H_4) \times V / (32Q) \times 100\%$  **(11)**, where  $Y_{N_2H_4}$  and  $FEN_2H_4$  are the yield and faradaic efficiency of  $N_2H_4$ , respectively;  $C(N_2H_4)$  is the molar concentration of measured  $N_2H_4$ ,  $V$  is the volume of the electrolyte,  $t$  is the electrolysis time,  $m_{cat.}$

is the mass of the loaded catalyst,  $F$  is the Faraday constant (96485 C mol<sup>-1</sup>) and  $Q$  is the total charge passing through the electrode ( $Q = \int_0^t j dt$ ,  $j$  is the geometric current density).

$E = a + b \log(|j_{\text{NH}_3}|)$  (12), where  $E$  is the applied potential vs. RHE,  $j_{\text{NH}_3}$  is the partial current density of  $\text{NH}_3$ ,  $a$  is a constant and  $b$  is the Tafel slope.

$\ln(C_0/C_t) = k_{\text{ap}}t$  (13), where  $k_{\text{ap}}$  is the apparent rate constant,  $C_0$  and  $C_t$  are the concentrations of  $\text{NO}_3^-$  in the electrolytes at the beginning and at reaction time  $t$ , respectively.

$1/r_0 = 1/(kK_{\text{ads}}C_0) + 1/k$  (14), where  $K_{\text{ads}}$  is the equilibrium adsorption constants for  $\text{NO}_3^-$ ,  $r_0$  is the initial reduction rate of  $\text{NO}_3^-$  ( $r_0 = k_{\text{ap}}C_0$ ),  $k$  is the rate constant for the adsorbed  $\text{NO}_3^-$ ,  $C_0$  is the initial concentration of  $\text{NO}_3^-$ .

$\Delta G_{\text{ads}} = -RT \ln K_{\text{ads}}$  (15), where  $\Delta G_{\text{ads}}$  is the adsorption free energy of  $\text{NO}_3^-$ ,  $R$  is the gas constant,  $T$  is the reaction temperature and  $K_{\text{ads}}$  is the equilibrium adsorption constants for nitrate ions.

$i_k = A e^{(-E_a/RT)}$  (16), where  $E_a$  is the apparent activation energy,  $i_k$  is the kinetic current at -0.5 V,  $A$  is the pre-exponential factor,  $T$  is the reaction temperature and  $R$  is the universal gas constant.

$j_p = (-2.99 \times 10^5) n \alpha^{1/2} C D^{1/2} \nu^{1/2}$  (17), where  $n$  is the charge transfer number,  $j_p$  is the peak current density (A cm<sup>-2</sup>),  $\alpha$  is transfer coefficient (0.5),  $C$  is the nitrate concentration in electrolytes ( $7.5 \times 10^{-5}$  mol cm<sup>-3</sup>),  $D$  is the diffusion coefficient of nitrate ions ( $2.0 \times 10^{-5}$  cm<sup>2</sup> s<sup>-1</sup>) and  $\nu$  is the scan rate (V s<sup>-1</sup>).

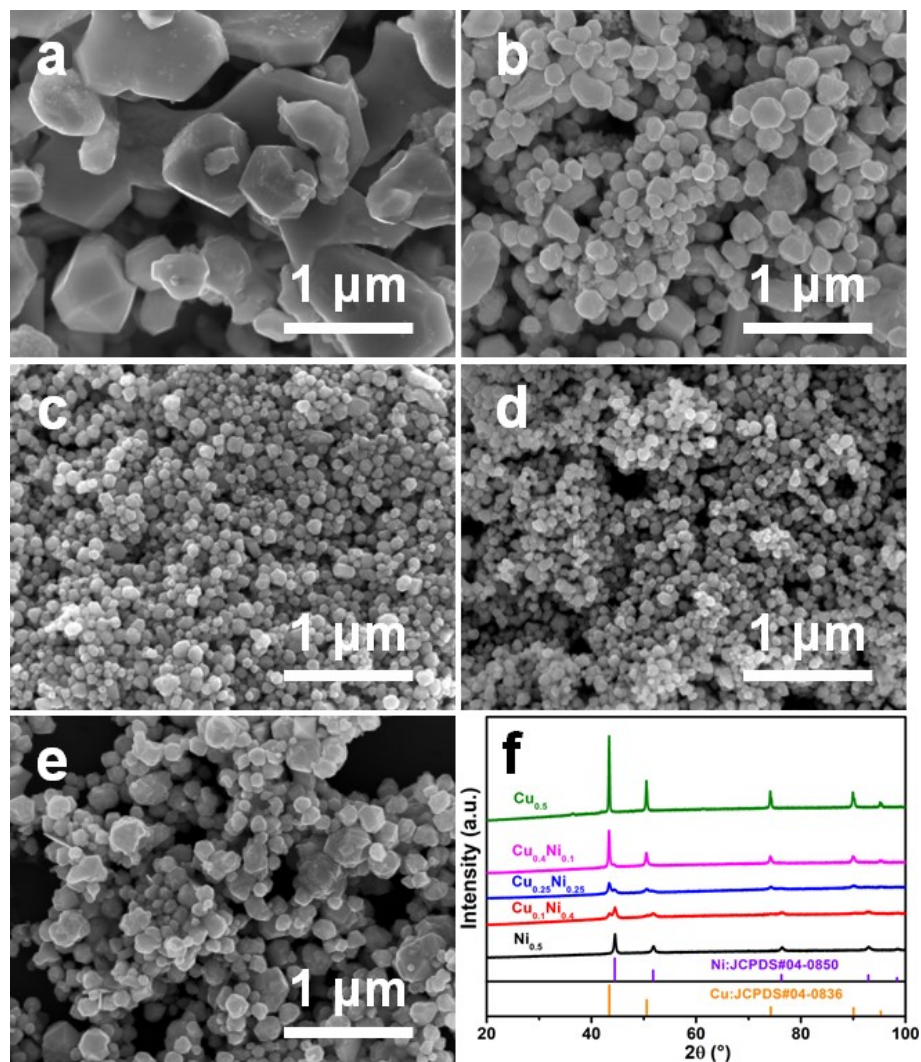

**Figure S1.** SEM images (a-e) and XRD patterns (f) for the samples of  $\text{Cu}_{0.5}$  (a),  $\text{Cu}_{0.4}\text{Ni}_{0.1}$  (b),  $\text{Cu}_{0.25}\text{Ni}_{0.25}$  (c),  $\text{Cu}_{0.1}\text{Ni}_{0.4}$  (d), and  $\text{Ni}_{0.5}$  (e).

**Table S1.** Molar ratios of Cu/Ni in the bimetal catalysts obtained from the ICP-MS tests.

| sample               | $\text{Cu}_{0.1}\text{Ni}_{0.4}$ | $\text{Cu}_{0.25}\text{Ni}_{0.25}$ | $\text{Cu}_{0.4}\text{Ni}_{0.1}$ |
|----------------------|----------------------------------|------------------------------------|----------------------------------|
| molar ratio of Cu/Ni | 1/3.35                           | 1/0.9                              | 5.37/1                           |

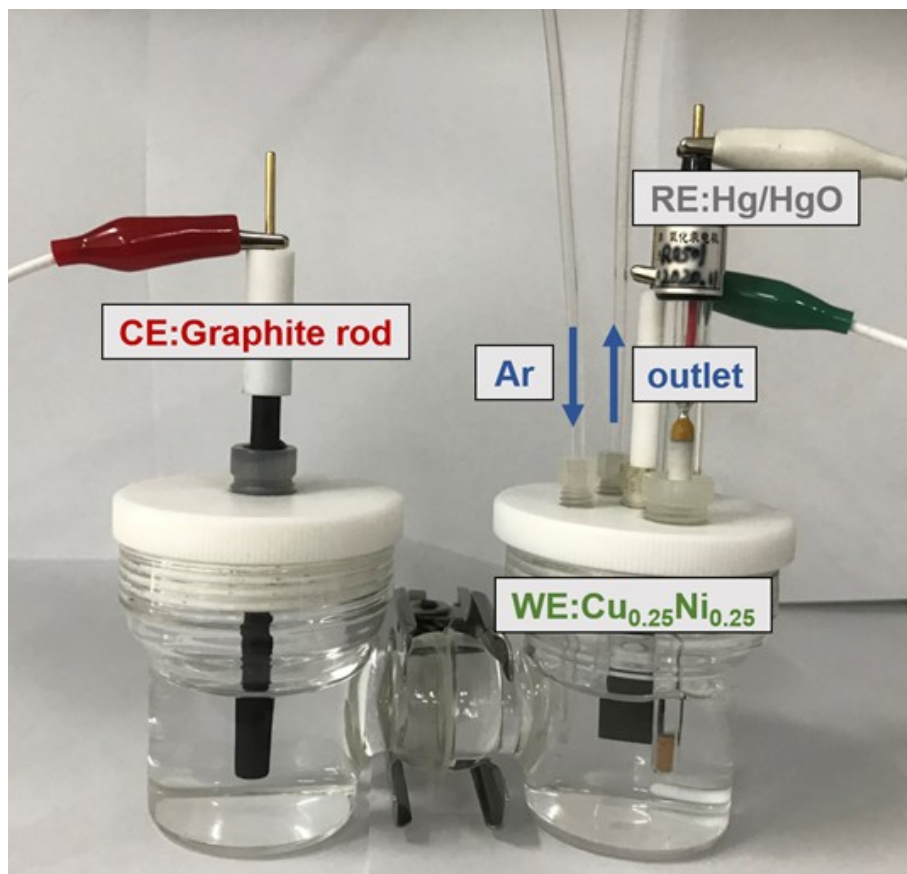

Figure S2. Photograph of the setup for NO<sub>3</sub>RR.

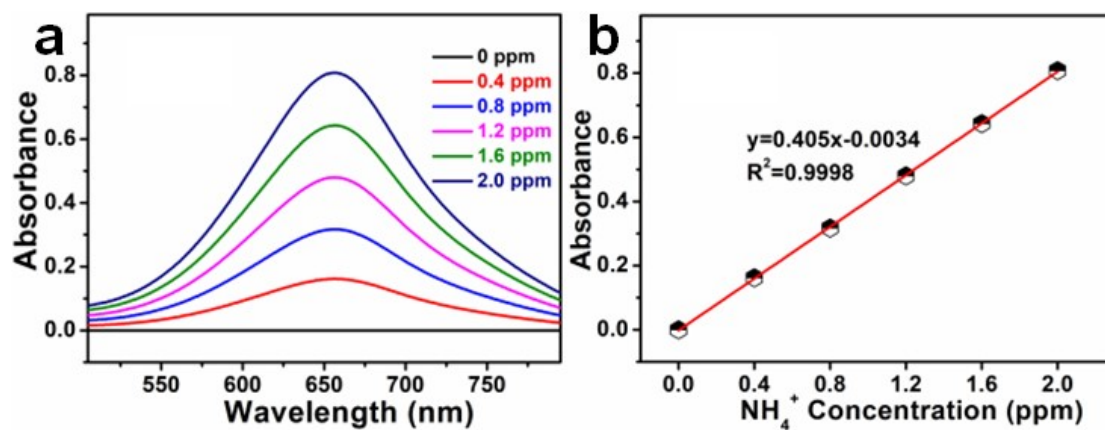

Figure S3. UV-vis absorption spectra of the standard NH<sub>4</sub>Cl solutions stained with the indophenol



blue coloring agent (a) and the corresponding standard curve (b).

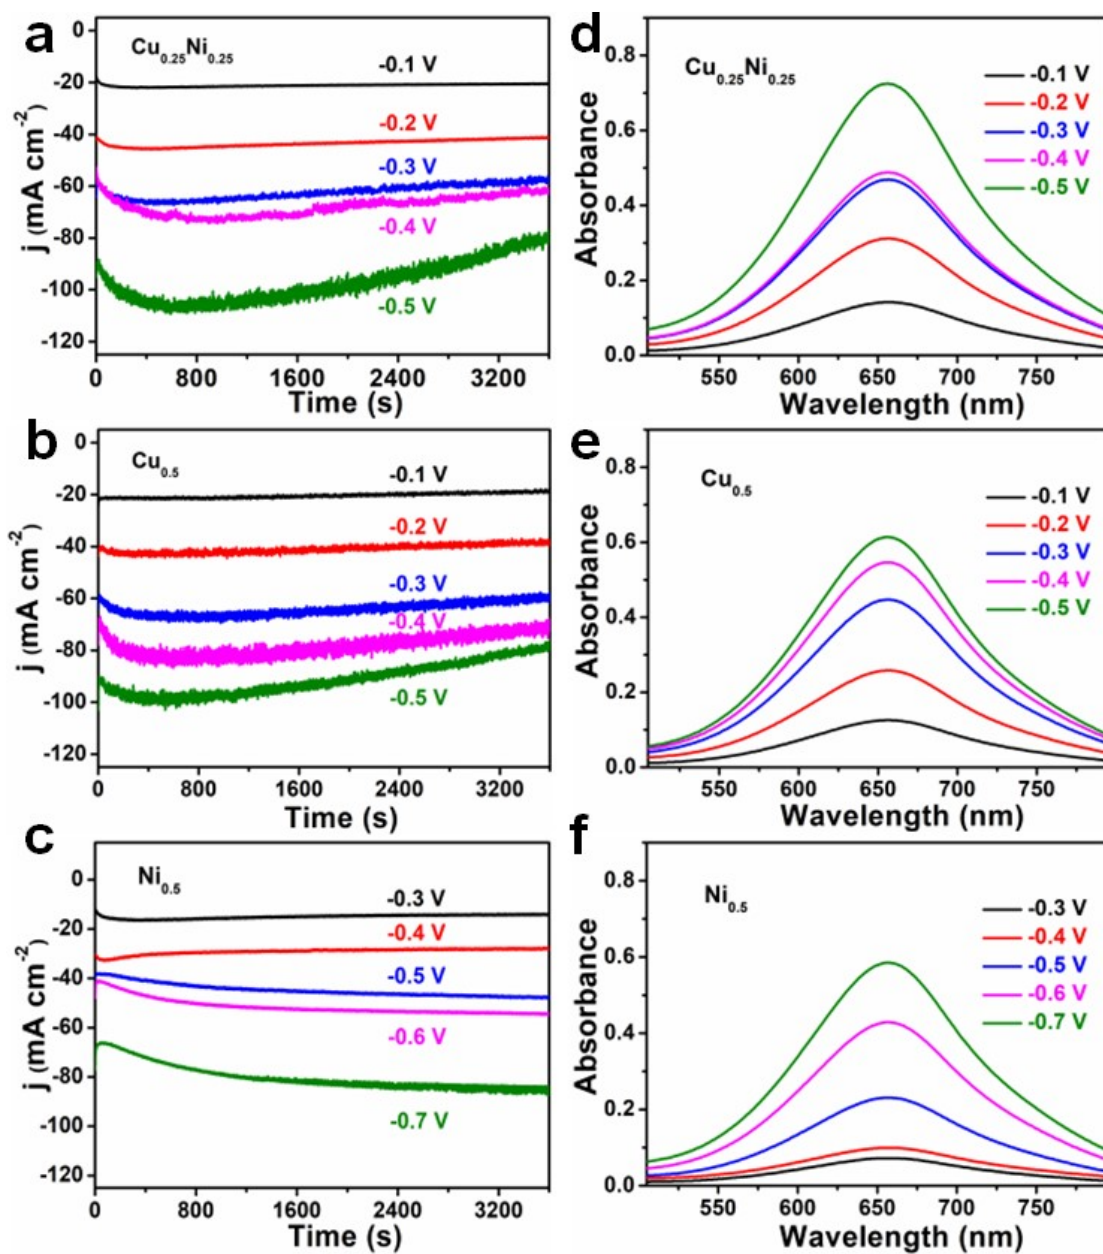

**Figure S4.** Chronoamperometric responses (a-c) and the corresponding UV-vis absorption spectra of the catholytes after electrolysis at different potentials stained with the indophenol blue (b-f) for the samples of  $\text{Cu}_{0.25}\text{Ni}_{0.25}$  (a, c),  $\text{Cu}_{0.5}$  (b, d) and  $\text{Ni}_{0.5}$  (c, f).

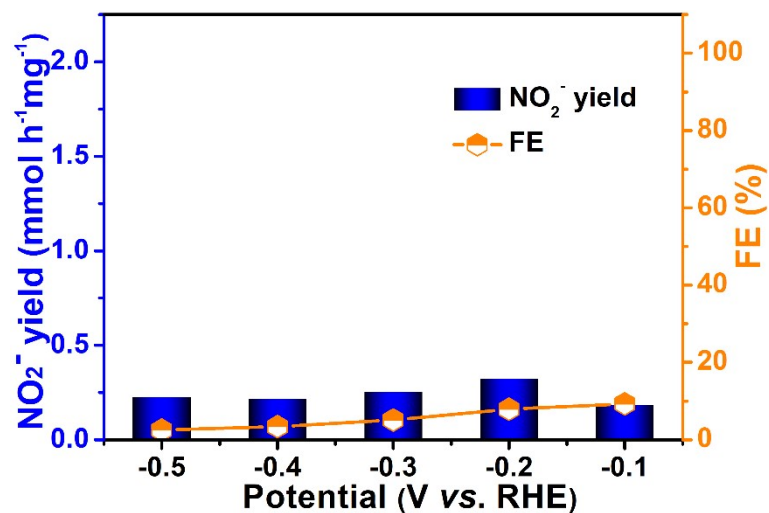

**Figure S5.** The yield and FE of the possible by-product of NO<sub>2</sub><sup>-</sup> after electrolysis in 1 M KOH solutions containing 75 Mm KNO<sub>3</sub> at different potentials with Cu<sub>0.25</sub>Ni<sub>0.25</sub> as the catalyst.

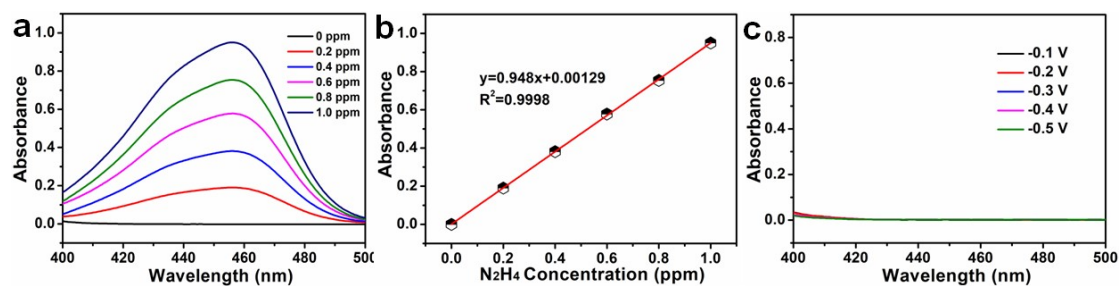

**Figure S6.** Determination of the possible by-product of N<sub>2</sub>H<sub>4</sub> according to the Watt-Chrisp method. UV-vis absorption spectra of the standard solutions of N<sub>2</sub>H<sub>4</sub> (a), the corresponding standard curve (b) and the UV-vis absorption spectra of the catholyte after electrolysis at different potentials with Cu<sub>0.25</sub>Ni<sub>0.25</sub> as the catalyst (c).

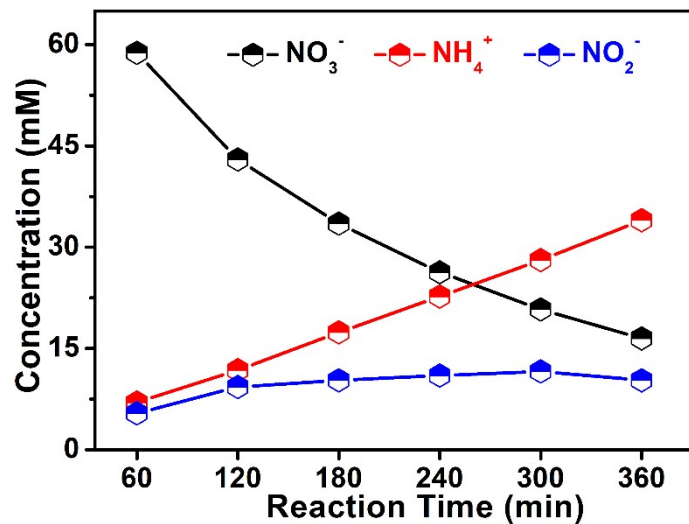

**Figure S7.** The concentration of  $\text{NO}_3^-$ ,  $\text{NO}_2^-$  and  $\text{NH}_4^+$  as a function of reaction time with  $\text{Cu}_{0.25}\text{Ni}_{0.25}$  as the catalyst.

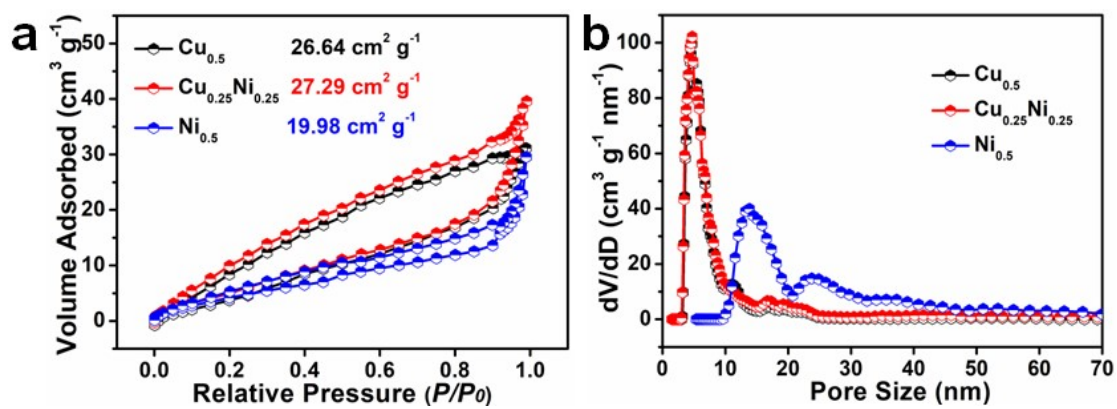

**Figure S8.**  $\text{N}_2$  adsorption-desorption isotherms (a) and the corresponding pore size distributions (b) for the samples of  $\text{Cu}_{0.25}\text{Ni}_{0.25}$ ,  $\text{Cu}_{0.5}$  and  $\text{Ni}_{0.5}$ .

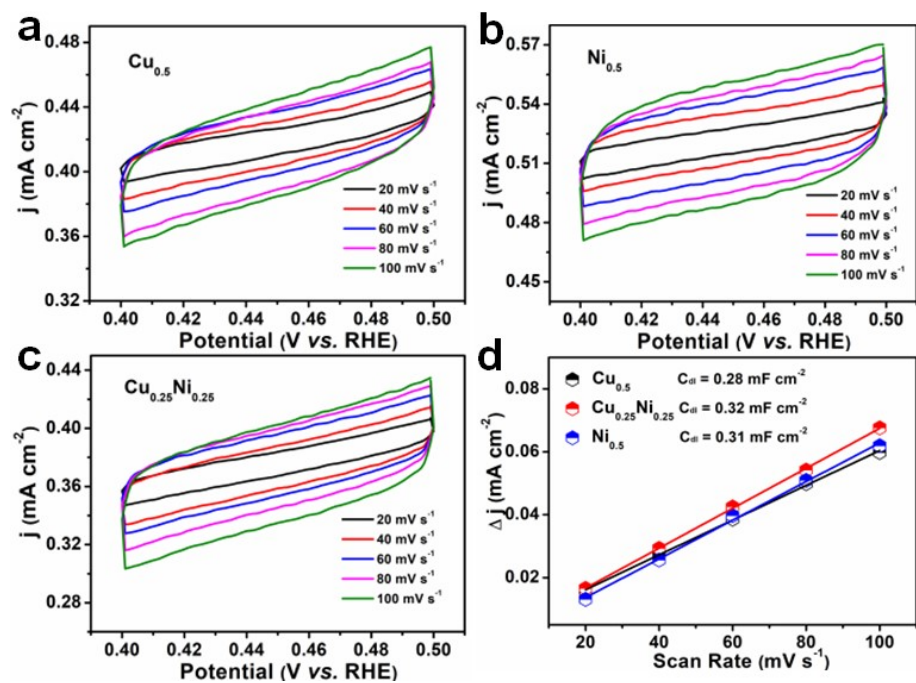

**Figure S9.** CV curves obtained at different scan rates in the non-faradaic potential ranges for the samples of  $\text{Cu}_{0.5}$  (a),  $\text{Ni}_{0.5}$  (b) and  $\text{Cu}_{0.25}\text{Ni}_{0.25}$  (c) and the corresponding double layer capacitances ( $C_{dl}$ ) (d).

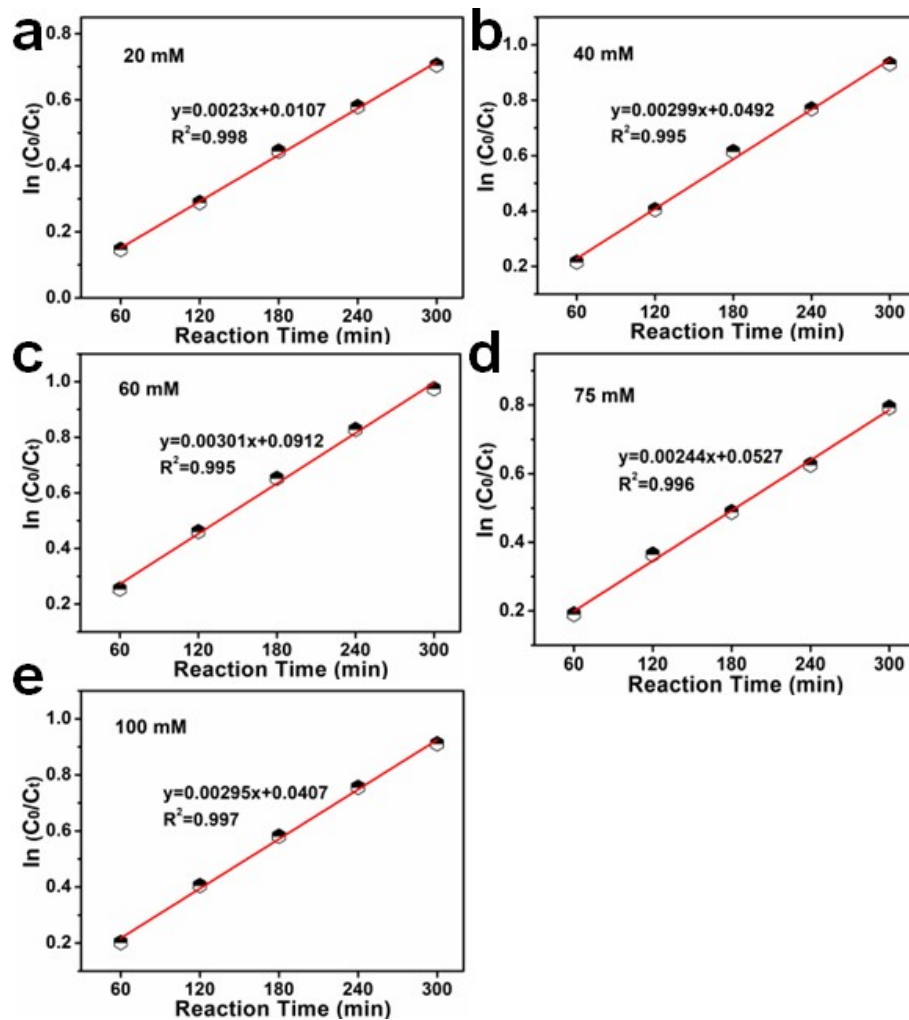

**Figure S10.** Linear fitting plots of  $\ln C_0/C_t$  against the reaction time  $t$  according to the pseudo first order kinetic equation for  $\text{Cu}_{0.5}$  with different initial nitrate concentrations in the electrolytes. (a) 20 mM, (b) 40 mM, (c) 60 mM, (d) 75 mM, (e) 100 mM.

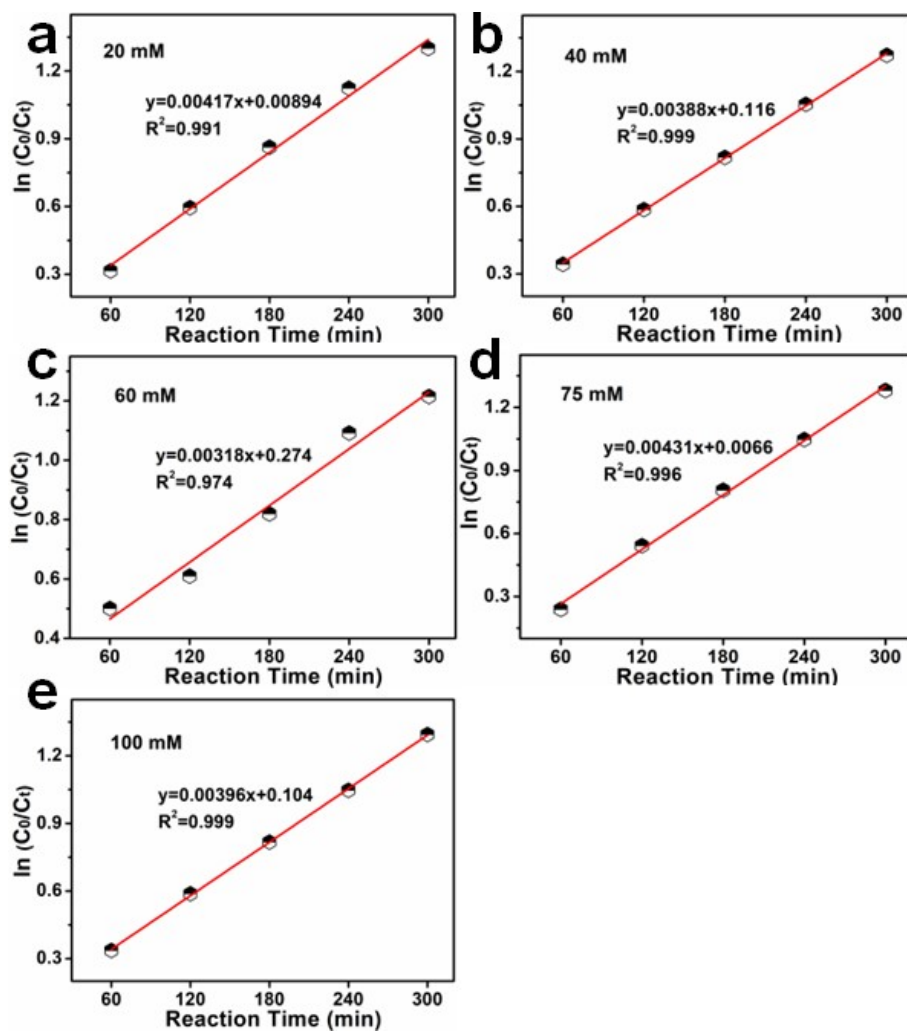

**Figure S11.** Linear fitting plots of  $\ln C_0/C_t$  against the reaction time  $t$  according to the pseudo first order kinetic equation for  $\text{Cu}_{0.25}\text{Ni}_{0.25}$  with different initial nitrate concentrations in the electrolytes. (a) 20 mM, (b) 40 mM, (c) 60 mM, (d) 75 mM, (e) 100 mM.

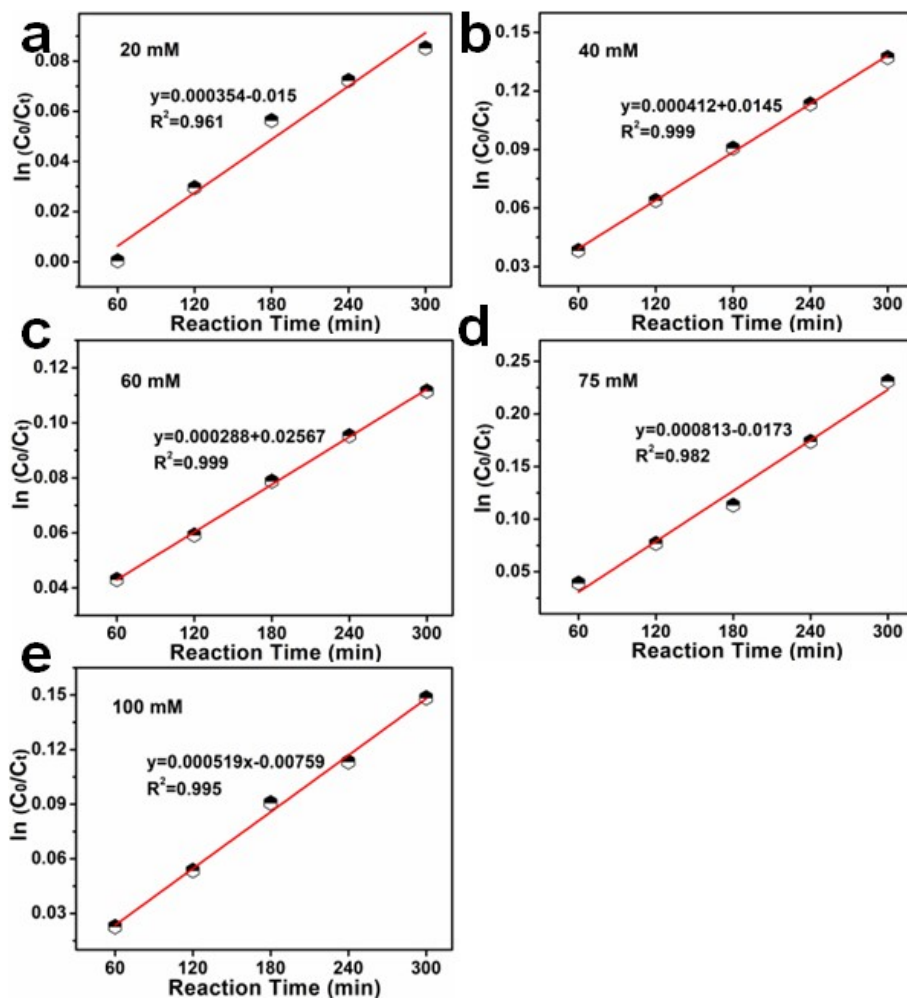

**Figure S12.** Linear fitting plots of  $\ln C_0/C_t$  against the reaction time  $t$  according to the pseudo first order kinetic equation for  $Ni_{0.5}$  with different initial nitrate concentrations in the electrolytes. (a) 20 mM, (b) 40 mM, (c) 60 mM, (d) 75 mM, (e) 100 mM.

**Table S2.** Binding energies of different components in Cu 2p and Ni 2p XPS for the samples of Cu<sub>0.5</sub>, Ni<sub>0.5</sub> and Cu<sub>0.25</sub>Ni<sub>0.25</sub>.

| Sample                                | Cu 2p                                 |                       |                                       |                       |                     |
|---------------------------------------|---------------------------------------|-----------------------|---------------------------------------|-----------------------|---------------------|
|                                       | Cu 2p <sub>3/2</sub>                  |                       | Cu 2p <sub>1/2</sub>                  |                       | Sat. (eV)           |
|                                       | Cu <sup>0</sup> /Cu <sup>+</sup> (eV) | Cu <sup>2+</sup> (eV) | Cu <sup>0</sup> /Cu <sup>+</sup> (eV) | Cu <sup>2+</sup> (eV) |                     |
| Cu <sub>0.5</sub>                     | 932.48                                | 952.32                | 934.52                                | 954.31                | 941.66/943.83/962.5 |
| Cu <sub>0.25</sub> Ni <sub>0.25</sub> | 932.33                                | 952.29                | 933.86                                | 953.82                |                     |
| Sample                                | Ni 2p                                 |                       |                                       |                       |                     |
|                                       | Ni 2p <sub>3/2</sub>                  |                       | Ni 2p <sub>1/2</sub>                  |                       | Sat. (eV)           |
|                                       | Ni <sup>0</sup> (eV)                  | Ni <sup>2+</sup> (eV) | Ni <sup>0</sup> (eV)                  | Ni <sup>2+</sup> (eV) |                     |
| Ni <sub>0.5</sub>                     | 852.21                                | 855.26                | 869.44                                | 872.93                | 860.73/879.61       |
| Cu <sub>0.25</sub> Ni <sub>0.25</sub> | 852.66                                | 855.66                | 869.97                                | 873.45                | 861.02/879.17       |

**Table S3.** Performance comparison with reported Cu or Ni-based catalysts for nitrate electroreduction to ammonia

| Catalyst                                             | Potential                | FE (%)      | Selectivity (%) | Yield (mmol h <sup>-1</sup> cm <sup>-2</sup> ) | Ref.             |
|------------------------------------------------------|--------------------------|-------------|-----------------|------------------------------------------------|------------------|
| <b>Cu<sub>0.25</sub>Ni<sub>0.25</sub></b>            | <b>-0.30<sup>a</sup></b> | <b>94.5</b> | <b>65.0</b>     | <b>0.5496</b>                                  | <b>This work</b> |
| Cu/Rgo/GP                                            | -1.40 <sup>b</sup>       | 96.8        | 19.4            | 0.0145                                         | [1]              |
| CF@Cu <sub>2</sub> O                                 | -0.60 <sup>a</sup>       | 94.2        | -               | 0.4418                                         | [2]              |
| pCuO-10                                              | -0.50 <sup>a</sup>       | 89.0        | -               | 0.2000                                         | [3]              |
| Cu-NBs-110                                           | -0.15 <sup>a</sup>       | 95.0        | 95.3            | 1.3000                                         | [4]              |
| Cu/Cu-Mn <sub>3</sub> O <sub>4</sub>                 | -1.30 <sup>a</sup>       | 92.4        | 87.6            | 0.2100                                         | [5]              |
| Cu/Cu <sub>2</sub> O NWs                             | -0.85 <sup>a</sup>       | 95.8        | 81.2            | 0.2449                                         | [6]              |
| Cu-N-C-800                                           | -1.30 <sup>b</sup>       | -           | 80.5            | 0.0003                                         | [7]              |
| Cu <sub>49</sub> Fe <sub>1</sub>                     | -0.70 <sup>a</sup>       | 94.5        | 86.8            | 0.2300                                         | [8]              |
| Pd <sub>0.4</sub> Cu <sub>0.6</sub>                  | -0.30 <sup>a</sup>       | -           | 49.0            | 0.0002                                         | [9]              |
| Cu-Bi                                                | -1.60 <sup>b</sup>       | -           | 19.0            | 0.0053                                         | [10]             |
| Bi <sub>2</sub> O <sub>3</sub> /CC                   | -10.0 <sup>c</sup>       | 47.8        | 80.3            | 0.0027                                         | [11]             |
| TiO <sub>2-x</sub>                                   | -1.60 <sup>b</sup>       | 85.0        | 87.1            | 0.0225                                         | [12]             |
| Co/CoO NAs                                           | -1.30 <sup>b</sup>       | 93.8        | 91.2            | 0.1940                                         | [13]             |
| nZVI@OMC-400                                         | -1.30 <sup>b</sup>       | 60.1        | 39.5            | 0.0010                                         | [14]             |
| Fe SAC                                               | -0.66 <sup>a</sup>       | 75.0        | 69.0            | 0.4600                                         | [15]             |
| Fe/Cu Composite                                      | 25.0 <sup>c</sup>        | -           | 70.0            | 0.0600                                         | [16]             |
| Co <sub>3</sub> O <sub>4</sub>                       | -0.65 <sup>a</sup>       | 1.23        | 33.6            | 0.8540                                         | [17]             |
| FeNC/MC                                              | -1.30 <sup>b</sup>       | -           | 19.0            | 0.0005                                         | [18]             |
| Sn <sub>0.8</sub> Pd <sub>0.2</sub> /SS              | -40.0 <sup>c</sup>       | -           | 14.0            | 0.0013                                         | [19]             |
| Co <sub>3</sub> O <sub>4</sub> -TiO <sub>2</sub> /Ti | -10.0 <sup>c</sup>       | -           | 24.0            | 0.0008                                         | [20]             |
| Ni-NSA-V <sub>Ni</sub>                               | -1.20 <sup>b</sup>       | 88.9        | 77.2            | 0.2360                                         | [21]             |
| Cu                                                   | -0.376 <sup>a</sup>      | -           | 85              | 0.2714                                         | [22]             |
| Pd-Cu/γAl <sub>2</sub> O <sub>3</sub>                | -0.844 <sup>a</sup>      | -           | 19.6            | 0.0091                                         | [23]             |
| Pd/TiO <sub>2</sub>                                  | -0.70 <sup>a</sup>       | 92.05       | -               | 0.0659                                         | [24]             |
| Ru-ST-12                                             | -0.20 <sup>a</sup>       | 100         | 99.0            | 1.1700                                         | [25]             |
| Ni-Fe <sup>0</sup> @ Fe <sub>3</sub> O <sub>4</sub>  | 5.0 <sup>c</sup>         | -           | 10.4            | 0.0009                                         | [26]             |

<sup>a</sup> The potentials were relative to the reversible hydrogen electrode (RHE).

<sup>b</sup> The potentials were relative to the saturated calomel electrode (SCE).



<sup>c</sup> The numbers were current densities (mA cm<sup>-2</sup>) at which the constant current electrolysis were performed and the performances were assessed.

## References

- [1] D. Yin, Y. Liu, P. Song, P. Chen, X. Liu, L. Cai and L. Zhang, *Electrochimica Acta.*, 2019, 324, 134846.
- [2] Q.Y. Chen, X.G. An, Q. Liu, X. Q. Wu, L. S. Xie, J. Zhang, W. T. Yao, Mohamed S. Hamdy, Q. Q. Kong and X. P. Sun. *Chem. Commun.*, 2022, 58, 517-520.
- [3] Rahman Daiyan, Thanh Tran-Phu, Priyank Kumar, a Kevin Iputera, Zizheng Tong, Joshua Leverett, Muhammad Haider Ali Khan, Ali Asghar Esmailpour, Ali Jalili, Maggie Lim, Antonio Tricoli, Ru-Shi Liu, Xunyu Lu, Emma Lovell and Rose Ama. *Energy Environ. Sci.*, 2021, 14, 3588-3598.
- [4] Q. Hu, Y. J. Qin, X. D. Wang, Z. Y. Wang, X. W. Huang, H. J. Zheng, Keru Gao, Hengpan Yang, P. X. Zhang, M. H. Shao and C. X. He. *Energy Environ. Sci.*, 2021, 14, 4989-4997.
- [5] H. J. Wang, Q. Q. Mao, T. L. Ren, T. Q. Zhou, K. Deng, Z. Q. Wang, X. N. Li, Y. Xu, and L. Wang. *ACS Appl. Mater. Interfaces.*, 2021, 13, 37, 44733-44741.
- [6] Y. Wang, W. Zhou, R. Jia, Y. Yu and B. Zhang, *Angew. Chem. Int. Ed.*, 2020, 59, 5350-5354.
- [7] Tonghe Zhu, Qiongsan Chen, Peng Liao, Weijian Duan, Sheng Liang, Zhang Yan, and Chunhua Feng. *Small.*, 2020, 16, 2004526.
- [8] C. Wang, Z. Liu, T. Hu, J. Li, L. Dong, F. Du, C. Li and C. Guo, *ChemSusChem*, 2021, 14, 1825-1829.
- [9] J. F. Su, I. Ruzybayev, I. Shah and C. P. Huang, *Appl. Catal. B: Environ.*, 2016, 180, 199-209.
- [10] Weichun Gao, Lulu Gao, Dan Li, Kaituo Huang, Li Cui, Jing Meng, Jiyan Liang. *J. Electroanal. Chem.*, 2018, 817, 202-209.
- [11] M. Chen, J. Bi, X. Huang, T. Wang, Z. Wang and H. Hao, *Chemosphere.*, 2021, 278, 130386.
- [12] R. Jia, Y. Wang, C. Wang, Y. Ling, Y. Yu and B. Zhang, *ACS Catal.*, 2020, 10, 3533-3540.
- [13] Y. Yu, C. Wang, Y. Yu, Y. Wang and B. Zhang, *Sci. China Chem.*, 2020, 63, 1469-1476.
- [14] A. Wei, J. Ma, J. Chen, Y. Zhang, J. Song and X. Yu, *Chem. Eng. J.*, 2018, 353, 595-605.
- [15] Z.-Y. Wu, M. Karamad, X. Yong, Q. Huang, D. A. Cullen, P. Zhu, C. Xia, Q. Xiao, M. Shakouri, F.-Y. Chen, J. Y. Kim, Y. Xia, K. Heck, Y. Hu, M. S. Wong, Q. Li, I. Gates, S. Siahrostami and H. Wang, *Nat. Commun.*, 2021, 12, 2870.
- [16] Y. M. Zhang, Y. L. Zhao, Z. Chen, L. Q. Wang, L. C. Zhou, P. P. Wu, F. Wang, and P. Ou. *J. Electrochem. Soc.*, 2018, 165, E420-E428.
- [17] Y. Wang, Y. Yu, R. Jia, C. Zhang and B. Zhang, *Natl. Sci. Rev.*, 2019, 6, 730-738.
- [18] W. Teng, J. Fan and W.-x. Zhang, *ACS Appl. Mater. Interfaces.*, 2020, 12, 28091-28099.
- [19] J. F. Su, W.-F. Kuan, H. Liu and C. P. Huang, *Appl. Catal. B: Environ.*, 2019, 257, 117909.
- [20] J. Gao, B. Jiang, C. Ni, Y. Qi, Y. Zhang, N. Oturan and M. A. Oturan, *Appl. Catal. B: Environ.*, 2019, 254, 391-402.
- [21] C. H. Wang, W. Zhou, Z. J. Sun, Y. T. Wang, B. Zhang and Y. F. Yu, *J. Mater. Chem. A*, 2021, 9, 239-243.
- [22] David Reyter, Gwenaël Chamoulaud, Daniel Bélanger, Lionel Roué. *J. Electroanal. Chem.*, 2006, 596, 13-24.
- [23] Z. Q. Zhang, Y. P. Xu, W. X. Shi, W. Wang, R. J. Zhang, X. Bao, B. Zhang, L. Li, F. Y. Cui. *Chem. Eng. J.*, 2016, 290, 201-208.

- [24] Y. Guo, R. Zhang, S. C. Zhang, Y. W. Zhao, Q. Yang, Z. D. Huang, B. B. Dong and C. Y. Zhi, *Energy Environ. Sci.*, 2021, 14, 3938–3944.
- [25] J. Li, G. Zhan, J. Yang, F. Quan, C. Mao, Y. Liu, B. Wang, F. Lei, L. Li, A. W. M. Chan, L. Xu, Y. Shi, Y. Du, W. Hao, P. K. Wong, J. Wang, S.-X. Dou, L. Zhang and J. C. Yu, *J. Am. Chem. Soc.*, 2020, 142, 7036-7046.
- [26] Z. A. Jonoush, A. Rezaee and A. Ghaffarinejad, *J. Clean. Prod.*, 2020, 242, 118569.
